# Supplementary material for: Lysophosphatidylcholine plays critical role in allergic airway disease manifestation
Source: PubMed Central journal article supplement (PMC4901285; doi:10.1038/srep27430), 2016-06-10
Supplement: srep27430-s1.pdf [file srep27430-s1.pdf]

# **Lysophosphatidylcholine plays critical role in allergic airway disease manifestation**

Preeti Bansal<sup>a,b</sup>, Shailendera Nath Gaur<sup>c</sup>, Naveen Arora<sup>a\*</sup>

<sup>a</sup>Allergy and Immunology Section, CSIR-Institute of Genomics and Integrative Biology,  
Delhi.

<sup>b</sup>Department of Biotechnology, University of Pune, Ganeshkhind, Pune 411 007, India

<sup>c</sup>Department of Pulmonary Medicine, V.P. Chest Institute, Delhi University, Delhi.

## **\*Corresponding Address:**

**Naveen Arora, Ph.D.**

**Room 509, Allergy and Immunology Section**

CSIR-Institute of Genomics and Integrative Biology,

Delhi University Campus, Mall Road,

Delhi-110007, INDIA

Tel: (011) 27666157, Fax: (011) 27667471

Email: [naveen@igib.res.in](mailto:naveen@igib.res.in)

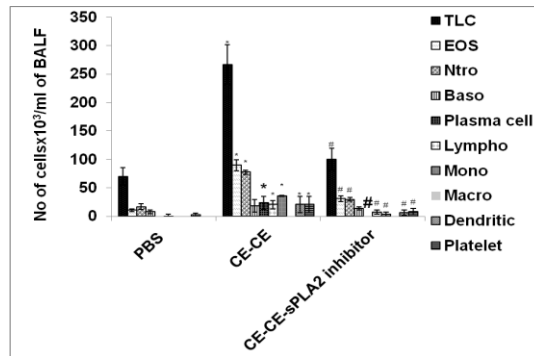

**Supplementary Figure1. TLC& DLC were increased in CE challenged mice and reduced on administration of sPLA2 inhibitor.** Vehicle control: *PBS*; mice sensitized and challenged with cockroach extract: *CE-CE*; and pre-administered with sPLA2 inhibitor: *CE-CE-sPLA2 inhibitor*. Data represent the means  $\pm$  SEM of values from 4 mice. \*,  $p < 0.05$  versus *PBS*; #,  $p < 0.05$  versus *CE-CE*.

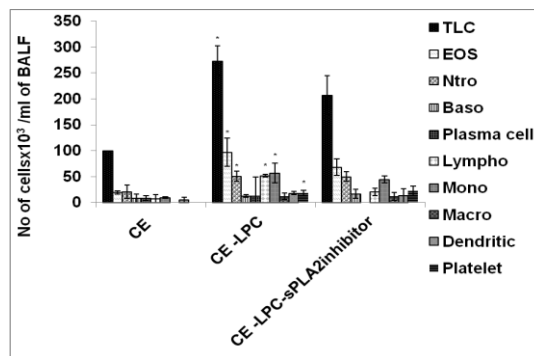

**Supplementary Figure2. LPC exposure in CE-sensitized mice increases total and differential cell count in BALF.** Mice sensitized with cockroach extract: *CE*; and exposed to LPC: *CE-LPC*; and pre-treated with sPLA2 inhibitor: *CE-LPC-sPLA2 inhibitor*. Data represent the means  $\pm$  SEM of values from 4 mice. \*,  $p < 0.05$  versus *CE*.

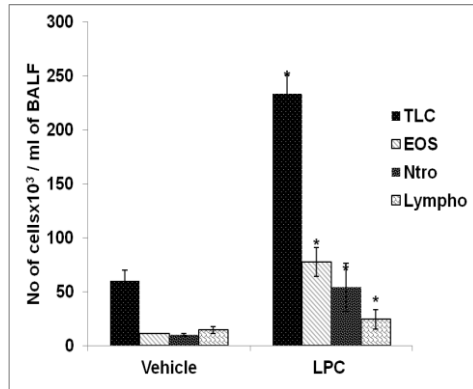

**Supplementary Figure3. LPC exposure without CE sensitization increases total and differential cell count in BALF.** Mice exposed to 5%DMSO: *Vehicle*; to LPC: *LPC*. Data represent the means  $\pm$  SEM of values from 4 mice. \*,  $p < 0.05$  versus *vehicle*.

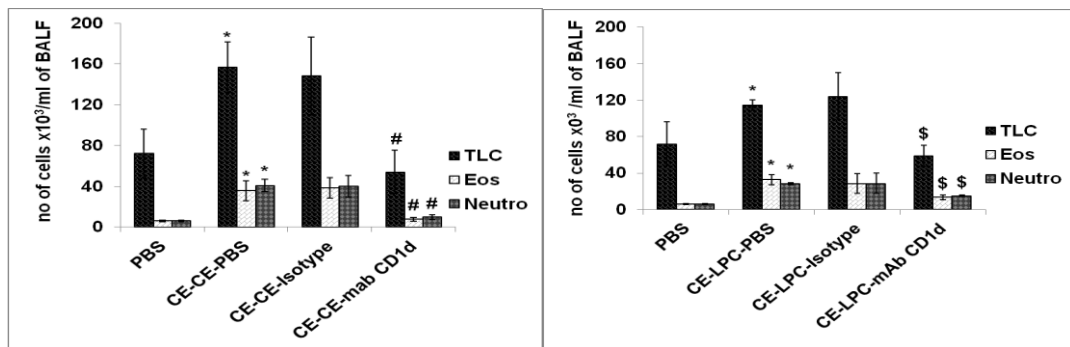

**Supplementary Figure4. CD1d blockage before CE challenge or LPC exposure decreases total and differential cell count.** a) vehicle control: *PBS*; mice sensitized and challenged with cockroach extract and pre-administered with PBS: *CE-CE-PBS*; with isotype: *CE-CE-Isotype*; or with anti-CD1d monoclonal antibody (mAb): *CE-CE-mAb CD1d*. b) vehicle control: *PBS*; mice sensitized with cockroach extract and exposed to LPC and pre-administered with PBS: *CE-LPC-PBS*; or with isotype: *CE-LPC-Isotype*; or with anti-CD1d mAb: *CE-LPC-mAb CD1d*. Data represent the means  $\pm$  SEM of values from 4 mice. \*,  $p < 0.05$  versus *PBS*; #,  $p < 0.05$  versus *CE-CE-PBS*; \$,  $p < 0.05$  versus *CE-LPC-PBS*.
